# Supplementary material
Source: publisher site journal article supplement (https://cdn.jamanetwork.com/ama/content_public/journal/intemed/935669/ioi160059supp1_prod.pdf)
Supplement: Supplementary file 1 [file ioi160059supp1_prod.pdf]

## Supplementary Online Content

Adrion ER, Ryan AM, Seltzer AC, Chen LM, Ayanian JZ, Nallamothu BK. Out-of-pocket spending for hospitalizations among nonelderly adults. *JAMA Intern Med*. Published online June 27, 2016. doi:10.1001/jamainternmed.2016.3663.

**eTable 1.** *ICD-9-CM* Codes Associated With Broad Diagnosis- and Procedure-Related Categories Generated by the AHRQ Clinical Classification Software

**eTable 2.** Adjusted Mean Cost Sharing per Inpatient Hospitalization Using First Hospitalization Only, 2009-2013

**eTable 3.** Proportion of Total Hospital Payments Paid Out-of-Pocket by Patients

**eTable 4.** Adjusted Mean Cost Sharing per Inpatient Hospitalization for Hospitalizations With Cost Sharing of Greater Than \$0, 2009-2013

**eTable 5.** Adjusted Mean Cost Sharing per Inpatient Hospitalization, High Market Share States Only

This supplementary material has been provided by the authors to give readers additional information about their work.

**eTable 1.** ICD-9-CM Codes Associated With Broad Diagnosis- and Procedure-Related Categories Generated by the AHRQ Clinical Classification Software

| CCS <sup>a</sup> Category Name | CCS <sup>a</sup> Category Number | ICD-9-CM Codes                                                                                                                                                                                                                                                                                                                                                                                  |
|--------------------------------|----------------------------------|-------------------------------------------------------------------------------------------------------------------------------------------------------------------------------------------------------------------------------------------------------------------------------------------------------------------------------------------------------------------------------------------------|
| <b>Diagnoses</b>               |                                  |                                                                                                                                                                                                                                                                                                                                                                                                 |
| Acute Myocardial Infarction    | 100                              | 4100 , 41000, 41001, 41002, 4101, 41010, 41011, 41012, 4102, 41020, 41021, 41022, 4103, 41030, 41031, 41032, 4104, 41040, 41041, 41042, 4105 , 41050, 41051, 41052, 4106, 41060, 41061, 41062, 4107, 41070, 41071, 41072, 4108, 41080, 41081, 41082, 4109, 41090, 41091, 41092                                                                                                                  |
| Appendicitis                   | 142                              | 5400, 5401, 5409, 541, 542, 5430, 5439                                                                                                                                                                                                                                                                                                                                                          |
| Liveborn                       | 218                              | 76520, 76529, V300, V3000, V3001, V301, V302, V310, V3100, V3101, V311, V312, V320, V3200, V3201, V321, V322, V330, V3300, V3301, V331, V332, V340, V3400, V3401, V341, V342, V350, V3500, V3501, V351, V352, V360, V3600, V3601, V361, V362, V370, V3700, V3701, V371, V372, V390, V3900, V3901, V391, V392                                                                                    |
| Pneumonia                      | 122                              | 00322, 0203, 0204, 0205, 0212, 0221, 0310, 0391, 0521, 0551, 0730, 0830, 1124, 1140, 1144, 1145, 11505, 11515, 11595, 1304, 1363, 4800, 4801, 4802, 4803, 4808, 4809, 481, 4820, 4821, 4822, 4823, 48230, 48231, 48232, 48239, 4824, 48240, 48241, 48242, 48249, 4828, 48281, 48282, 48283, 48284, 48289, 4829, 483, 4830, 4831, 4838, 4841, 4843, 4845, 4846, 4847, 4848, 485, 486, 5130, 5171 |
| <b>Procedures</b>              |                                  |                                                                                                                                                                                                                                                                                                                                                                                                 |
| Arthroplasty Knee              | 152                              | 0080, 0081, 0082, 0083, 0084, 8141, 8142, 8143, 8144, 8146, 8147, 8154, 8155                                                                                                                                                                                                                                                                                                                    |
| Coronary Artery Bypass Graft   | 44                               | 3610, 3611, 3612, 3613, 3614, 3615, 3616, 3617, 3619, 362, 363, 3631, 3632, 3633, 3634, 3639                                                                                                                                                                                                                                                                                                    |
| Spinal Fusion                  | 158                              | 8100, 8101, 8102, 8103, 8104, 8105, 8106, 8107, 8108, 8109, 8130, 8131, 8132, 8133, 8134, 8135, 8136, 8137, 8138, 8139, 8161, 8162, 8163, 8164, 8451                                                                                                                                                                                                                                            |

<sup>a</sup> CCS = Clinical Classification Software.

Agency for Healthcare Research and Quality. Healthcare Cost and Utilization Project Clinical Classification Software (CCS) for ICD-9-CM. Available at: <https://www.hcup-us.ahrq.gov/toolssoftware/ccs/ccs.jsp>

**eTable 2.** Adjusted Mean Cost Sharing per Inpatient Hospitalization Using First Hospitalization Only, 2009-2013

|                               | <b>I.<br/>All years, 2009-2013</b> |                                  | <b>II.<br/>2009</b> |                                  | <b>III.<br/>2013</b> |                                  | <b>IV.<br/>2009-<br/>2013</b> |
|-------------------------------|------------------------------------|----------------------------------|---------------------|----------------------------------|----------------------|----------------------------------|-------------------------------|
|                               | <i>n</i>                           | <i>Adjusted Mean<sup>a</sup></i> | <i>n</i>            | <i>Adjusted Mean<sup>a</sup></i> | <i>n</i>             | <i>Adjusted Mean<sup>a</sup></i> | <i>% change</i>               |
| <b>Overall</b>                | 5,908,997                          | \$999                            | 1,237,064           | \$855                            | 1,142,824            | \$1,177                          | +37.7%                        |
| <b>Male</b>                   | 1,847,596                          | \$1,080                          | 383,540             | \$935                            | 358,291              | \$1,257                          | +34.4%                        |
| <b>Female</b>                 | 4,061,401                          | \$962                            | 853,524             | \$819                            | 784,533              | \$1,140                          | +39.2%                        |
| <b>Age 18-34</b>              | 2,214,384                          | \$980                            | 444,687             | \$831                            | 451,389              | \$1,155                          | +39.0%                        |
| <b>Age 35-64</b>              | 3,694,613                          | \$1,010                          | 792,377             | \$868                            | 691,435              | \$1,191                          | +37.2%                        |
| <b>Individual Market Plan</b> | 98,386                             | \$2,066                          | 19,613              | \$1,918                          | 20,047               | \$2,239                          | +16.7%                        |
| <b>Group Plan</b>             | 5,810,611                          | \$981                            | 1,217,451           | \$838                            | 1,122,777            | \$1,158                          | +38.2%                        |
| <b>CDHP<sup>b</sup></b>       | 926,312                            | \$1,285                          | 127,843             | \$1,132                          | 256,973              | \$1,416                          | +25.1%                        |
| <b>Non-CDHP</b>               | 4,982,685                          | \$946                            | 1,109,221           | \$823                            | 885,851              | \$1,107                          | +34.5%                        |
| <b>HMO<sup>c</sup></b>        | 379,202                            | \$1,077                          | 83,131              | \$929                            | 81,192               | \$1,252                          | +34.8%                        |
| <b>Non-HMO</b>                | 5,529,795                          | \$993                            | 1,153,933           | \$849                            | 1,061,632            | \$1,171                          | +37.9%                        |

<sup>a</sup> All costs are inflation-adjusted to 2013 dollars. Predicted cost sharing was calculated by estimating regression models that adjusted for the DRG weights of the hospitalizations and applying the post-estimation margins command in STATA v.14 to obtain predicted costs. All inpatient hospitalizations were included in the regression models, including those hospitalizations for which out-of-pocket spending was \$0.

<sup>b</sup> CDHP = Consumer-directed health plan. A CDHP is typically a health plan with a high deductible that is paired with a health savings account (HSA), a flexible spending account (FSA) or a health reimbursement arrangement (HRA). In the HCCI database, each insurer flagged the members they considered to be enrolled in a CDHP.

<sup>c</sup> HMO = health maintenance organization.

**eTable 3.** Proportion of Total Hospital Payments Paid Out-of-Pocket by Patients

|                                                                                                                             | 2009     | 2010     | 2011     | 2012     | 2013     |
|-----------------------------------------------------------------------------------------------------------------------------|----------|----------|----------|----------|----------|
| Adjusted mean hospital payment <sup>1</sup>                                                                                 | \$13,654 | \$14,290 | \$14,707 | \$15,241 | \$16,091 |
| Proportion of total hospital payment paid out-of-pocket by patient <sup>2</sup>                                             | 11.2%    | 11.6%    | 11.7%    | 11.8%    | 12.7%    |
| Proportion of total hospital payment paid out-of-pocket by patient in the form of a copayment <sup>2</sup>                  | 1.4%     | 1.2%     | 1.0%     | 0.9%     | 0.8%     |
| Proportion of total hospital payment paid out-of-pocket by patient in the form of coinsurance <sup>2</sup>                  | 6.9%     | 7.3%     | 7.3%     | 7.3%     | 7.5%     |
| Proportion of total hospital payment paid out-of-pocket by patient in the form of payment towards a deductible <sup>2</sup> | 2.8%     | 3.1%     | 3.3%     | 3.6%     | 4.4%     |

Note: All costs are inflation-adjusted to 2013 dollars.

<sup>1</sup> Total hospital payment includes the insurer's payment to the hospital plus patient cost sharing (copayment + coinsurance + amount applied to the deductible). Mean total hospital payments were calculated by estimating regression models that adjusted for the DRG weights of the hospitalizations and applying the post-estimation margins command in STATA v.14 to obtain predicted costs.

<sup>2</sup> Proportion of hospital payment paid out-of-pocket by patient was calculated by estimating regression models that adjusted for the DRG weights of the hospitalizations and applying the post-estimation margins command in STATA v.14 to obtain predicted percentage. All inpatient hospitalizations were included in the regression models, including those hospitalizations for which out-of-pocket spending was \$0.

**eTable 4.** Adjusted Mean Cost Sharing per Inpatient Hospitalization for Hospitalizations With Cost Sharing of Greater Than \$0, 2009-2013

|                                                                                                                          | <b>2009</b>              | <b>2010</b>              | <b>2011</b>              | <b>2012</b>              | <b>2013</b>              |
|--------------------------------------------------------------------------------------------------------------------------|--------------------------|--------------------------|--------------------------|--------------------------|--------------------------|
| Total number of inpatient hospitalizations                                                                               | 1,556,756                | 1,479,491                | 1,446,735                | 1,432,554                | 1,401,232                |
| <i>Total cost sharing</i>                                                                                                |                          |                          |                          |                          |                          |
| Adjusted mean total cost sharing among hospitalizations with total cost sharing >\$0 (95% CI)                            | \$1,055<br>(1,053-1,158) | \$1,174<br>(1,171-1,177) | \$1,231<br>(1,228-1,234) | \$1,309<br>(1,306-1,312) | \$1,459<br>(1,456-1,462) |
| Percentage of annual inpatient hospitalizations with total cost sharing >\$0                                             | 69.9%                    | 69.9%                    | 69.2%                    | 68.3%                    | 69.4%                    |
| <i>Copayments</i>                                                                                                        |                          |                          |                          |                          |                          |
| Adjusted mean copayment among hospitalizations with a copayment >\$0 (95% CI)                                            | \$299<br>(298-299)       | \$314<br>(313-315)       | \$312<br>(311-313)       | \$320<br>(319-321)       | \$328<br>(327-329)       |
| Percentage of annual inpatient hospitalizations with copayments >\$0                                                     | 25.0%                    | 22.1%                    | 20.0%                    | 17.8%                    | 16.8%                    |
| <i>Coinsurance</i>                                                                                                       |                          |                          |                          |                          |                          |
| Adjusted mean coinsurance among hospitalizations with coinsurance >\$0 (95% CI)                                          | \$1,020<br>(1,017-1,023) | \$1,096<br>(1,093-1,099) | \$1,121<br>(1,118-1,124) | \$1,157<br>(1,154-1,160) | \$1,242<br>(1,239-1,245) |
| Percentage of annual inpatient hospitalizations with coinsurance >\$0                                                    | 50.8%                    | 53.1%                    | 53.7%                    | 54.1%                    | 55.4%                    |
| <i>Deductibles</i>                                                                                                       |                          |                          |                          |                          |                          |
| Adjusted mean amount applied to the deductible among hospitalizations with amount applied to deductible of >\$0 (95% CI) | \$981<br>(976-987)       | \$1,048<br>(1,043-1,053) | \$1,140<br>(1,135-1,146) | \$1,197<br>(1,192-1,202) | \$1,264<br>(1,260-1,269) |
| Percentage annual inpatient hospitalizations with amount applied to deductible >\$0                                      | 14.8%                    | 16.1%                    | 16.4%                    | 17.7%                    | 21.4%                    |

Note: All costs are inflation-adjusted to 2013 dollars. Adjusted mean cost sharing was calculated by estimating regression models that adjusted for the DRG weights of the hospitalizations and applying the post-estimation margins command in STATA v.14 to obtain predicted costs.

**eTable 5.** Adjusted Mean Cost Sharing per Inpatient Hospitalization, High Market Share States Only<sup>1,2</sup>

|                                              | <b>2009</b> | <b>2010</b> | <b>2011</b> | <b>2012</b> | <b>2013</b> |
|----------------------------------------------|-------------|-------------|-------------|-------------|-------------|
| Adjusted mean total cost sharing             | \$742       | \$830       | \$872       | \$922       | \$1,053     |
| Adjusted mean copayments                     | \$76        | \$71        | \$63        | \$55        | \$54        |
| Adjusted mean coinsurance                    | \$502       | \$570       | \$595       | \$623       | \$692       |
| Adjusted mean payment towards the deductible | \$164       | \$189       | \$214       | \$244       | \$307       |

<sup>1</sup> Sample restricted to states where HCCI-contributing insurers have 30% or greater combined market share. States include: AK, AZ, CO, CT, DC, FL, GA, OH, KY, MO, ME, NJ, RI, TX, WI. Approximately 54% of hospitalized members in our dataset resided in these 15 states over the study period.

<sup>2</sup> All costs are inflation-adjusted to 2013 dollars. Predicted cost sharing was calculated by estimating regression models that adjusted for the DRG weights of the hospitalizations and applying the post-estimation margins command in STATA v.14 to obtain predicted costs. All inpatient hospitalizations were included in the regression models, including those hospitalizations for which out-of-pocket spending was \$0.
